# Supplementary material for: MoS2-wrapped Mn0.2Cd0.8S nanospheres towards efficient photocatalytic H2generation and CO2reduction
Source: Royal Society of Chemistry journal article supplement (doi:10.1039/d0nj02174a), 2020-01-01
Supplement: d0nj02174a1.pdf [file d0nj02174a1.pdf]

**Supporting Information for**

**MoS<sub>2</sub>-wrapped Mn<sub>0.2</sub>Cd<sub>0.8</sub>S nanospheres towards efficient photocatalytic H<sub>2</sub>  
generation and CO<sub>2</sub> reduction**

Jiaqian Lu, Zhe Zhang, Lin Cheng and Hong Liu \*

Department of Chemical Engineering, School of Environmental and Chemical  
Engineering, Shanghai University, 99 Shangda Road, Shanghai 200444, PR China

\*Corresponding Author:

liuhong@shu.edu.cn (H. Liu)

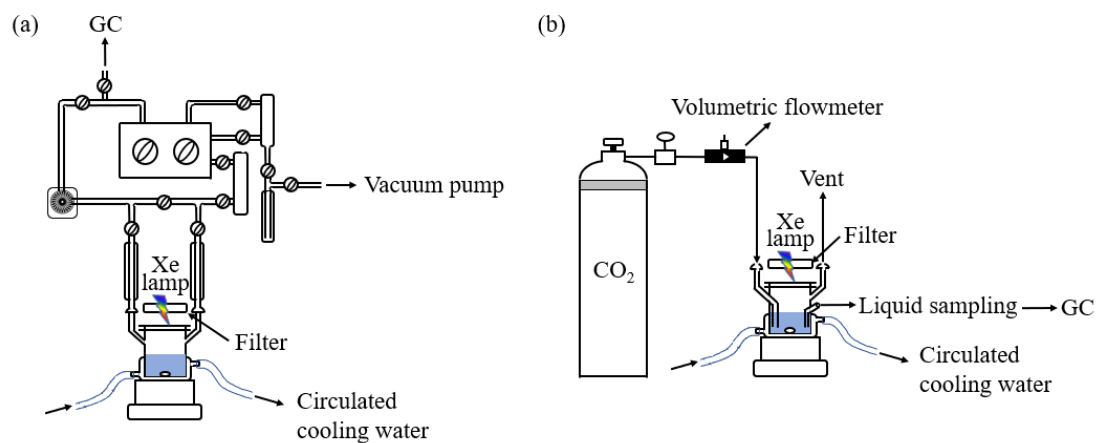

Fig. S1 Schematic of experimental setup for (a) photocatalytic H<sub>2</sub> production and (b) photocatalytic reduction of CO<sub>2</sub>

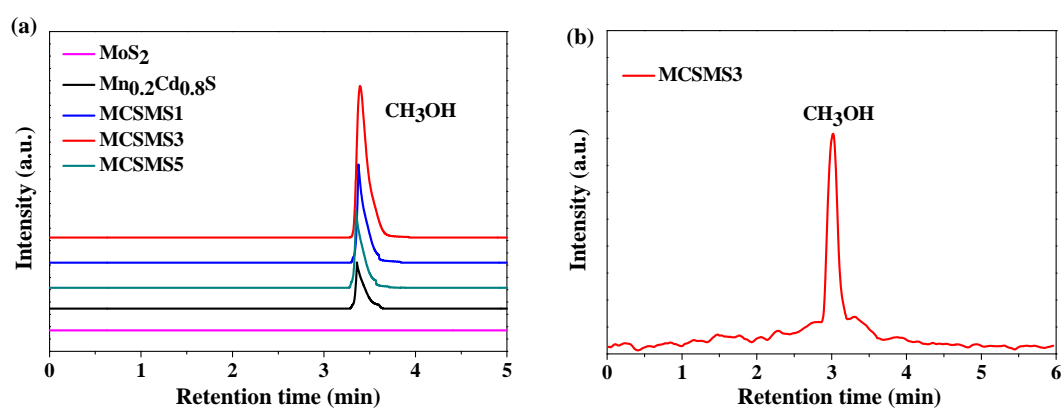

Fig. S2 (a) GC chromatograms and (b) HPLC chromatogram for the as-synthesized samples after 4 h of irradiation

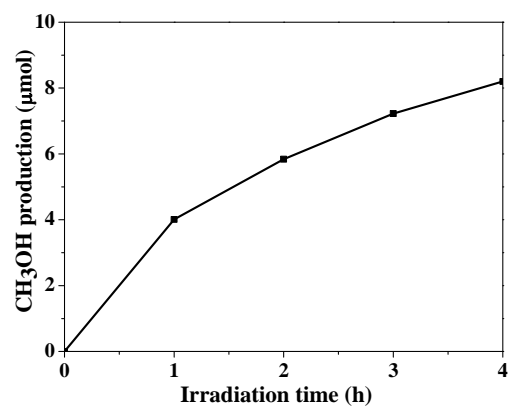

Fig. S3 Time courses of CH<sub>3</sub>OH production over MCSMS3 using NaHCO<sub>3</sub> (0.1 M) instead of bubbling CO<sub>2</sub>
